# Supplementary material for: Actual Use of Medications Prescribed During Pregnancy: A Cross-Sectional Study Using Data from a Population-Based Congenital Anomaly Registry
Source: PubMed Central journal article supplement — Drug Saf. 2015 Jun 4;38(8):737–47. doi: 10.1007/s40264-015-0302-z (PMC4513216; doi:10.1007/s40264-015-0302-z), 2015-06-04
Supplement: 40264_2015_302_MOESM1_ESM.pdf [file 40264_2015_302_MOESM1_ESM.pdf]

## **Electronic Supplementary Material # 1 - Questionnaire**

For each prescription the following aspects were verified:

- Did you actually use the medication prescribed?
  - No
  - Yes
  - Do not remember
  
- Did you start with the medication direct after the date of prescription?
  - No, ... days/weeks/months later
  - Yes
  - Do not remember
  
- Was the daily dose used conform prescription?
  - No, the daily dose used was higher/ lower than prescribed
  - Yes
  - Do not remember
  
- Was the duration conform prescription?
  - No, the medication was used shorter/longer than prescribed
  - Yes
  - Do not remember
  
- Did you stop the use of the medication for a while and continued later on in pregnancy?
  - No
  - Yes
    - When?
    - For how long?
  - Do not remember
