# Supplementary material for: Actual Use of Medications Prescribed During Pregnancy: A Cross-Sectional Study Using Data from a Population-Based Congenital Anomaly Registry
Source: PubMed Central journal article supplement — Drug Saf. 2015 Jun 4;38(8):737–47. doi: 10.1007/s40264-015-0302-z (PMC4513216; doi:10.1007/s40264-015-0302-z), 2015-06-04
Supplement: 40264_2015_302_MOESM2_ESM.pdf [file 40264_2015_302_MOESM2_ESM.pdf]

Drug Safety

Actual Use of Medications Prescribed During Pregnancy: A Cross-Sectional Study using data from a Population Based Congenital Anomaly Registry

L de Jonge, HEK de Walle, LTW de Jong-van den Berg, IM van Langen, MK Bakker

**Electronic Supplementary Material #2: Compliance rates calculated according to the standard definition, in a selected population including only live births and still births and according to the strict compliance definition**

|                                               | "standard" ~<br>definition of<br>compliance | Compliance rate among<br>LB and SB population,<br>excluding SA and TOPFAs | Strict*<br>'compliance'<br>definition |
|-----------------------------------------------|---------------------------------------------|---------------------------------------------------------------------------|---------------------------------------|
| <b>First trimester</b>                        |                                             |                                                                           |                                       |
| Total number of women                         | 129                                         | 107                                                                       | 129                                   |
| medications for chronic use                   | 0.84 (0.74-0.95) <sup>^</sup>               | 0,83 (0,71-0,96) <sup>^</sup>                                             | 0,82 (0,71-0,93) <sup>^</sup>         |
| medications for short-term and occasional use | 0.86 (0.78-0.94) <sup>^</sup>               | 0,85 (0,76-0,94) <sup>^</sup>                                             | 0,84 (0,76-0,93) <sup>^</sup>         |
| medications for pregnancy related symptoms    | 0.92 (0.82-0.96) <sup>#</sup>               | 0,92 (0,81-0,97) <sup>#</sup>                                             | 0,88 (0,80-0,96) <sup>^</sup>         |
| <b>Entire pregnancy</b>                       |                                             |                                                                           |                                       |
| Total number of women                         | 202                                         | 172                                                                       | 202                                   |
| medications for chronic use                   | 0.92 (0.86-0.98) <sup>^</sup>               | 0,92 (0,84-0,97) <sup>#</sup>                                             | 0,91 (0,84-0,97) <sup>^</sup>         |
| medications for short-term and occasional use | 0.90 (0.85-0.95) <sup>^</sup>               | 0,89 (0,83-0,95) <sup>^</sup>                                             | 0,89 (0,84-0,94) <sup>^</sup>         |
| medications for pregnancy related symptoms    | 0.95 (0.90-0.99) <sup>^</sup>               | 0,96 (0,90-0,98) <sup>#</sup>                                             | 0,92 (0,87-0,97) <sup>^</sup>         |

~ standard definition of compliance: If a mother confirmed that she had taken **at least one** of the prescriptions of a specific medication. If a medication was prescribed more than once and the mother had taken just one prescription, she was still counted as a compliant user for that medication.

\* strict definition of compliance: if a mother confirmed that she had taken **all** of the prescriptions of a specific medication. If a medication was prescribed more than once but not all the prescriptions had been taken, she was not counted as a 'compliant user'.

<sup>^</sup> Wald-method was applied

<sup>#</sup> Wilson-method was applied
